# Supplementary material for: The role of agriculture in women’s nutrition: Empirical evidence from India
Source: PLOS journal article supplement (doi:10.1371/journal.pone.0201115), 2018-08-15
Supplement: S6 (10.1371/journal.pone.0201115.s006) [file journal.pone.0201115.s006]

**Table S6: Relationship between Child's Weight-for-Height & Mother's BMI**

| Independent Variable            | Dependent Variable- WHZ |                |
|---------------------------------|-------------------------|----------------|
| Mother's BMI                    | 0.0622***               | 0.0656***      |
| <i>(Cluster-Robust p-Value)</i> | <i>(0.005)</i>          | <i>(0.004)</i> |
| <i>(Wild Bootstrap p-Value)</i> | <i>(0.004)</i>          | <i>(0.004)</i> |
| Age in Months                   | -0.00726                | -0.00724       |
| Sex                             | -0.106                  | -0.113         |
| Birth Order                     | -0.0163                 | -0.0123        |
| Mother's Education              | 0.00979                 | 0.00915        |
| Mother's Age                    | -0.0149                 | -0.0177        |
| Ag. Income                      | 0.0601                  | 0.0494         |
| Cultivated Area                 | -0.00768                | -0.00612       |
| Ag. Sector Participation        | -0.295                  | -0.184         |
| Livestock Income                | 0.00778                 | 0.00696        |
| Non- Ag. Income                 | 0.0239*                 | 0.0228*        |
| Unearned Income                 | 0.0457***               | 0.0455***      |
| Ag. Labor Income                | -0.00112                | -0.00308       |
| Constant                        | -1.981**                | -1.286*        |
| HH has Water                    | 0.129                   | 0.107          |
| HH has Toilet                   | 0.0439                  | 0.0297         |
| Village Rainfall                | NO                      | -0.00819       |
| Observations                    | 709                     | 709            |

Notes: Standard errors are clustered at the village level. All income variables have been transformed using an inverse hyperbolic sine transformation. \*\*\* p<0.01, \*\* p<0.05, \* p<0.1, + p<0.15.
